# Supplementary material for: The Preseason Warming of the Indian Ocean Resulting in Soybean Failure in U.S.
Source: Copernicus journal article supplement (doi:10.5194/egusphere-2025-2930), 2025-07-04
Supplement: Supplementary file 1 [file egusphere-2025-2930-supplement.pdf]

# Supplementary

Table S1: Oceanic indices used in this study and their definitions and source

| Index   | Definition                                                                                                                                                      | Source                                                                                                                      |
|---------|-----------------------------------------------------------------------------------------------------------------------------------------------------------------|-----------------------------------------------------------------------------------------------------------------------------|
| Niño1+2 | The averaged SSTA in the region (0°-10° S, 90°-80° W)                                                                                                           | <a href="https://psl.noaa.gov/data/correlation/nina1.anom.data">https://psl.noaa.gov/data/correlation/nina1.anom.data</a>   |
| Niño3.4 | The averaged SSTA in the region (5° N-5° S, 150°-90° W)                                                                                                         | <a href="https://psl.noaa.gov/data/correlation/nina34.anom.data">https://psl.noaa.gov/data/correlation/nina34.anom.data</a> |
| Niño3   | The averaged SSTA in the region (5° N-5° S, 170°-120° W)                                                                                                        | <a href="https://psl.noaa.gov/data/correlation/nina3.anom.data">https://psl.noaa.gov/data/correlation/nina3.anom.data</a>   |
| Niño4   | The averaged SSTA in the region (5° N-5° S, 160° E-150° W)                                                                                                      | <a href="https://psl.noaa.gov/data/correlation/nina4.anom.data">https://psl.noaa.gov/data/correlation/nina4.anom.data</a>   |
| SOI     | A measure based on the difference in SLP anomalies between Tahiti and Darwin, Australia                                                                         | <a href="https://psl.noaa.gov/data/correlation/soi.data">https://psl.noaa.gov/data/correlation/soi.data</a>                 |
| PDO     | The leading principal component of monthly SSTA in the North Pacific Ocean                                                                                      | <a href="https://psl.noaa.gov/data/correlation/pdo.data">https://psl.noaa.gov/data/correlation/pdo.data</a>                 |
| NPI     | The area-weighted SLP over the region (30° N-65° N, 160° E-140° W)                                                                                              | <a href="https://psl.noaa.gov/data/correlation/np.data">https://psl.noaa.gov/data/correlation/np.data</a>                   |
| TSA     | The averaged SSTA in the region (0°-20° S, 10° E-30° W)                                                                                                         | <a href="https://psl.noaa.gov/data/correlation/tsa.data">https://psl.noaa.gov/data/correlation/tsa.data</a>                 |
| TNA     | The averaged SSTA in the region (5.5°N-23.5°N, 15°-57.5°W)                                                                                                      | <a href="https://psl.noaa.gov/data/correlation/tna.data">https://psl.noaa.gov/data/correlation/tna.data</a>                 |
| AMO     | The averaged SSTA in the North Atlantic Ocean (0°-70° N)                                                                                                        | <a href="https://psl.noaa.gov/data/correlation/amon.us.data">https://psl.noaa.gov/data/correlation/amon.us.data</a>         |
| IOD     | The difference in SSTA between the western equatorial Indian Ocean (50°-70° E, 10° S-10° N) and the southeastern equatorial Indian Ocean (90°-110° E, 10° S-0°) | calculated                                                                                                                  |
| IOB     | The averaged SSTA in the region (20° S-20° N, 40° -110° E)                                                                                                      | calculated                                                                                                                  |

Table S2: Regression coefficients of various meteorological factors in ridge regression

| Variable | Coefficient |
|----------|-------------|
| DTR      | -0.66735    |
| SMroot   | 0.627568    |
| Tmx      | -0.527428   |
| Tmp      | -0.446923   |
| Pre      | -0.402184   |
| Tmn      | -0.030895   |
| Cld      | 0.328608    |
| Wet      | -0.108994   |
| VPD      | -0.106505   |
| DSRF     | 0.089041    |

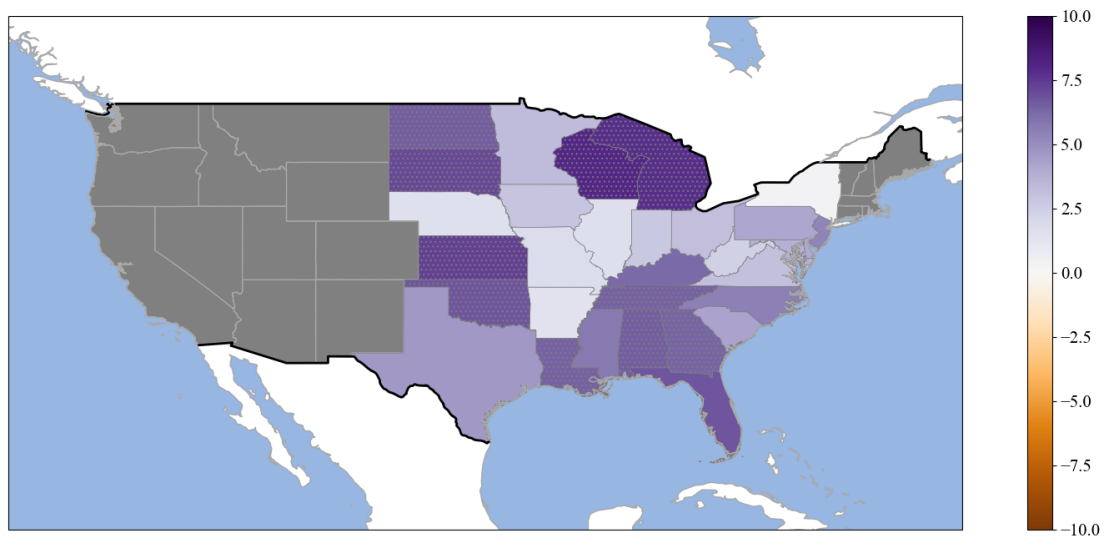

Figure S1: Spatial distribution of the sensitivity of soybean yield anomalies to the standardized Niño3.4 index during MJJ (May–July) from 1980 to 2017. The values represent the change in the percent yield anomaly per one standard deviation ( $1\sigma$ ) increase in the standardized Niño3.4 index. Dots indicate statistically significant correlations at the 90% confidence level (t-test).

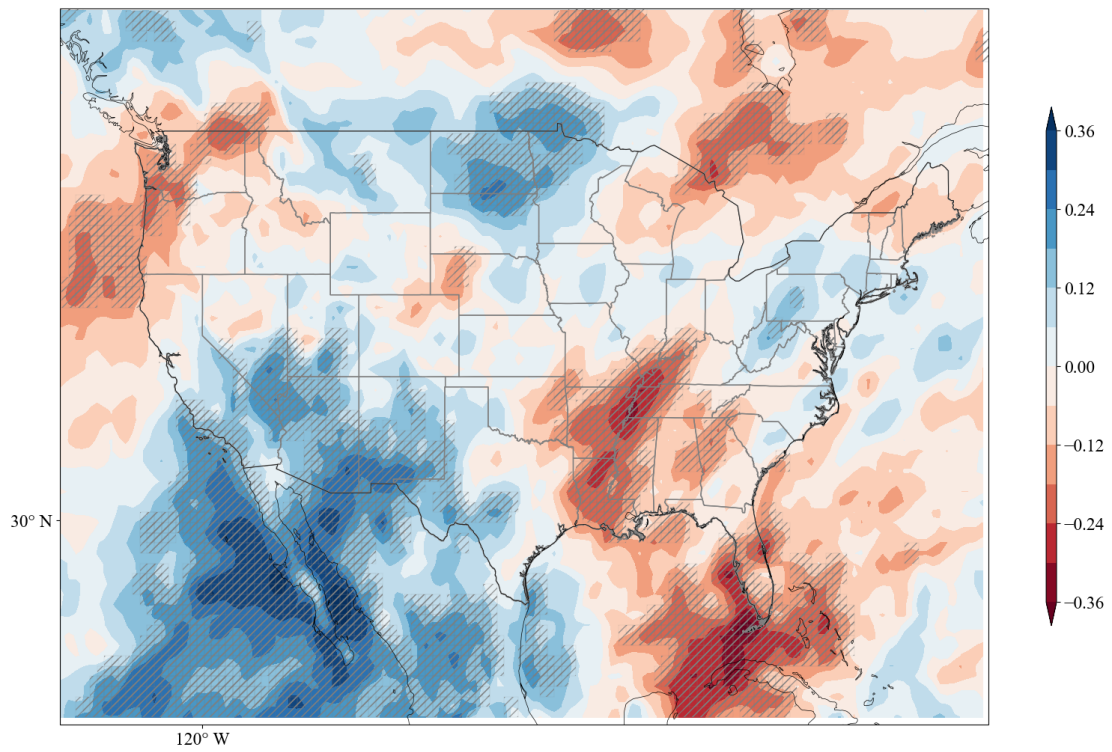

Figure S2: Responses of vertically integrated moisture divergence ( $\text{kg}\cdot\text{m}^{-2}$ ) to the standardized IOB index during ND(-1)J. The variable was standardized before analysis. Values indicate the standardized change (in  $\sigma$  units) in vertically integrated moisture divergence per  $1\sigma$  increase in the standardized IOB index. Shaded areas with diagonal hatching indicate regions where the response is statistically significant at the 90% confidence level (t-test).

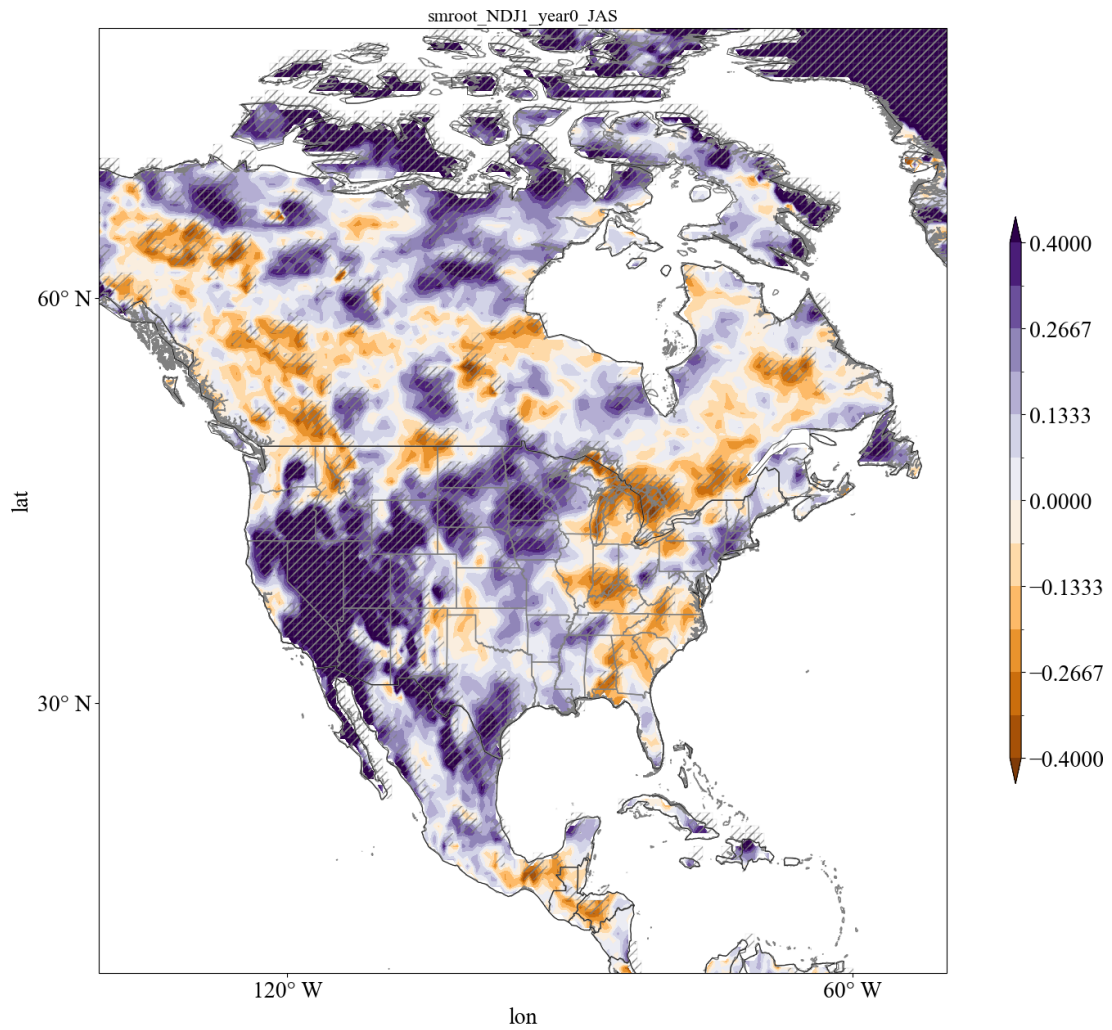

Figure S3: The correlation between SMroot during ND(-1)J and during JAS. Shaded areas with diagonal hatching indicate regions where the response is statistically significant at the 90% confidence level (t-test).

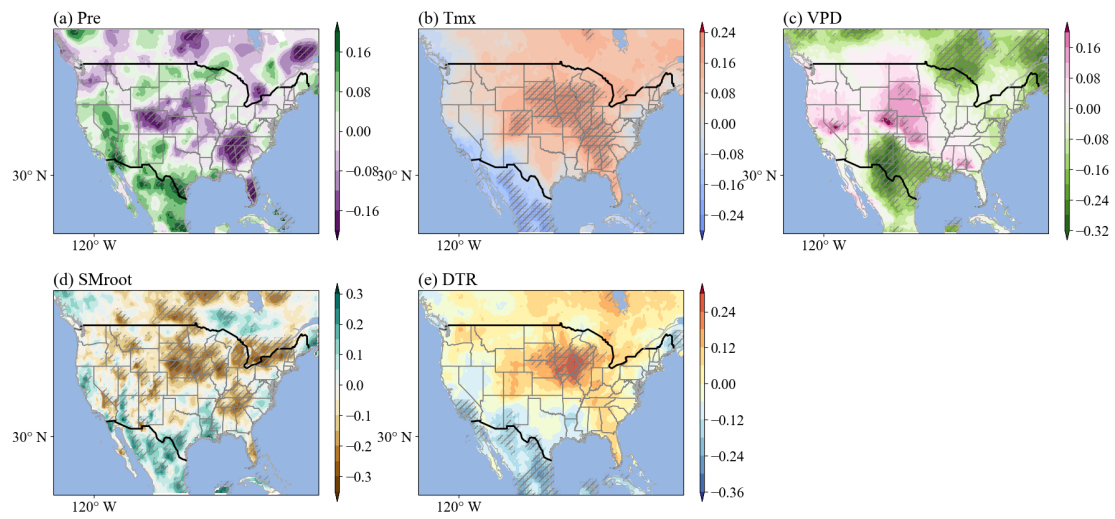

Figure S4: Responses of (a) precipitation (Pre, mm·d<sup>-1</sup>), (b) maximum temperature (Tmx, °C), (c) vapor pressure deficit (VPD, hPa), (d) root zone soil moisture (SMroot, m<sup>3</sup>·m<sup>-3</sup>), and (e) diurnal temperature range (DTR, °C) during JAS to the standardized IOB index during ND(-1)J. All variables were standardized before analysis. Values represent standardized changes (in  $\sigma$  units) in each variable per  $1\sigma$  increase in the standardized IOB index. Shaded areas with diagonal hatching indicate regions where the response is statistically significant at the 90% confidence level (t-test).
