# Supplementary material for: The Preseason Warming of the Indian Ocean Resulting in Soybean Failure in U.S.
Source: Copernicus journal article supplement (doi:10.5194/egusphere-2025-2930), 2025-07-04
Supplement: Supplementary file [file egusphere-2025-2930-AC2-supplement.pdf]

## Response to reviewer 2

Thank you for carefully reviewing our manuscript. We address each point below, quoting the comments and providing our responses. All changes to the manuscript are indicated with section/line references.

Methods:

1. **Reviewer Comment:** More details are needed on the Gram-Schmidt orthogonalisation method, it is too vague for now. Among questions and points that I would like to see explained: Can you explain what it does and how you applied it? Can you expand the motivation for this (or what would happen without this step)? Could you be missing signal or information by doing that (special attention to ENSO here)? And if this is a common approach / which other studies have done this before?

**Response:** We have substantially expanded the explanation of Gram–Schmidt orthogonalization in the Statistical analyses (Section 2.2). Specifically, Gram–Schmidt orthogonalization is a standard technique in linear algebra that provides a straightforward framework for transforming a set of potentially correlated variables into an orthogonal (uncorrelated) set by sequentially projecting each variable onto the orthogonal space of the previously processed ones (Giraud et al., 2005). This approach was applied to remove the linear ENSO (Niño 3.4) signal from our climate indices before further analyses. It ensures that subsequent correlation and regression analyses isolate the Indian Ocean effects independently of ENSO.

We acknowledge that Gram-Schmidt orthogonalization has potential limitations, such as its dependence on the ordering of variables and sensitivity to numerical instability in the presence of multicollinearity. However, since we only orthogonalized ENSO, the ordering issue is minimized. Nevertheless, we note that the method guarantees independence only at zero lag, so lead-lag interactions between ENSO and Indian Ocean warming may not be fully removed. To establish precedent, we also refer to recent studies that adopted this approach to control for ENSO influences in climate analyses (Hou et al., 2024).

**Manuscript changes:** In Section 2.2 (Lines 97–99), we revised the text as follows:

B Before conducting the specific analyses, we employed Gram–Schmidt orthogonalization to remove the linear influence of ENSO (represented by Niño3.4) from the IOB index, other climate indices, meteorological factors, and large-scale circulation fields. This method transforms correlated variables into orthogonal sets by sequentially projecting each target variable onto the space orthogonal to ENSO. The ENSO-independent component of a variable  $X$  was calculated as:

$$X_{\perp E} = X - \left( \frac{\langle X, E \rangle}{\langle E, E \rangle} \right) E \quad (5)$$

Where  $X$  is the original variable,  $E$  the ENSO signal, and  $\langle \cdot, \cdot \rangle$  denotes the inner product. Through this procedure, only the variability linearly independent of ENSO is retained, enabling a clearer attribution of Indian Ocean–related effects. We note that while this approach ensures zero-lag statistical independence from ENSO, lead–lag influences cannot be fully eliminated, as ENSO and Indian Ocean warming often co-evolve and interact across seasons. Similar approaches have been applied in recent climate studies (Hou et al., 2024).

2. **Reviewer Comment:** Can you explain and justify the initial choice of meteorological variables? Is this based on previous studies, do similar studies select the same variables? It reads a bit unclear and arbitrary right now.

**Response:** The meteorological variables were selected based on previous agronomic and climate–yield studies that consistently highlight temperature (including its diurnal range, DTR), precipitation, radiation, soil moisture, and humidity as the dominant drivers of soybean yield variability (Gaupp et al., 2020; Hamed et al., 2021; Joshi et al., 2021; Otkin et al., 2016; Ray et al., 2015; Schaubberger et al., 2017). In addition, vapor pressure deficit (VPD) has been widely used as a proxy for atmospheric dryness and crop stress (Ergo et al., 2018). To provide transparency, we now include a summary of all variables, their definitions, sources, and supporting references in the Supplementary Material (Table S1).

We also note that, in addition to the widely recognized variables, we included cloud cover (Cld) as an exploratory factor. This variable is less commonly studied in soybean yield analyses, but we considered it relevant due to its potential to affect surface energy balance and crop growth. This rationale is now clarified in the revised manuscript and Supplementary Table S1.

**Manuscript changes:** In Section 2.1 (Lines 81–92), we rewrote the paragraph as:

To assess the impact of meteorological factors on soybean yields in the United States, we selected ten key variables from the Climatic Research Unit (CRU) TS v4.07 dataset and the ERA5 reanalysis (Harris et al., 2020; Hersbach et al., 2020). These include temperature [maximum (Tmx, °C), mean (Tmp, °C), minimum (Tmn, °C), diurnal temperature range (DTR, °C)], precipitation (Pre, mm·d<sup>−1</sup>), wet day frequency (Wet, days), cloud cover (Cld, %), downward shortwave radiation flux (DSRF, W·m<sup>−2</sup>), root-zone soil moisture (SMroot, m<sup>3</sup>·m<sup>−3</sup>; Layer 2, 7–28 cm depth), and vapor pressure deficit (VPD, hPa). Eight of these variables were obtained from CRU, which provides monthly mean gridded data at 0.25° × 0.25° resolution, while SMroot was obtained from ERA5 as a proxy for soybean root water uptake. The choice of variables is consistent with previous studies highlighting the role of temperature, precipitation, radiation, soil moisture, and humidity in soybean yields (Gaupp et al., 2020; Gobin and Van de Vyver, 2021; Hamed et al., 2021; Joshi et al., 2021; Leng and Hall, 2019; Ray et al., 2015; Schaubberger et al., 2017), with VPD included as an additional dryness indicator (Ergo et al., 2018). VPD was calculated using the following formulas:

$$e_0 = 6.108 \exp \left( \frac{17.27 \times \text{Tmp}}{\text{Tmp} + 237.3} \right) \quad (3)$$

$$\text{VPD} = e_0 - e_a \quad (4)$$

Where Tmp is the monthly average temperature (°C), and  $e_a$  is the average actual vapor pressure (hPa), both from the CRU dataset.  $e_0$  represents the monthly mean saturated vapor pressure (hPa). A summary of all variables and references, including units, is provided in Table S1 in the Supplementary.

- 3. Reviewer Comment:** It is not clear in the text to me how root zone soil moisture is obtained or calculated. You refer to the ERA5 dataset, but as far as I am aware, this variable is not available on the ERA5 repository.

**Response:** In the original manuscript, we referred to “root-zone soil moisture” (SMroot) but did not provide sufficient detail. SMroot was directly obtained from the ERA5 reanalysis dataset as the volumetric soil water content ( $\text{m}^3 \cdot \text{m}^{-3}$ ). ERA5 provides soil moisture for four layers (0–7 cm, 7–28 cm, 28–100 cm, and 100–289 cm). For this study, we used Layer 2 (7–28 cm depth), which corresponds to the major root water uptake zone for soybean crops. Previous agronomic studies indicate that soybean roots extract most water from the top 30 cm of soil, especially during the reproductive phase, making Layer 2 a reasonable proxy for root-zone soil moisture (Fan et al., 2016; Zhang et al., 2024).

**Manuscript changes:** In Section 2.1 (Lines 85–87), we rewrote the soil moisture description as: “In addition, root zone soil moisture (SMroot,  $\text{m}^3 \cdot \text{m}^{-3}$ ) was obtained from the ERA5 reanalysis dataset (Hersbach et al., 2020), using Layer 2 (7–28 cm depth) as a proxy for soybean root water uptake.”

- 4. Reviewer Comment:** When comparing IOB with meteorological variables, you extract SLP from CRU but geopotential height at 200 hPa, and wind components at 925 hPa from ERA5. ERA5 also has SLP, so is there a reason for this? I would argue that having all variables from the same source would guarantee consistency. If you decide to keep SLP from CRU, it should be shown how similar it behaves between the two sources.

**Response:** We thank the reviewer for carefully checking this point. We would like to clarify that in our analysis, SLP was in fact obtained from ERA5, not from CRU. The reference to CRU in the Methods was a writing error. In the revised manuscript, we have corrected this and now state explicitly that all circulation variables (SLP, GPH200, and wind components) were consistently obtained from ERA5 (Section 2.1). We apologize for the oversight and thank the reviewer for helping us improve the clarity of the manuscript.

**Manuscript changes:** We corrected the description of the data source in Section 2.1 (line 95). The sentence has been revised to: “All variables were obtained from the ERA5 reanalysis dataset (Hersbach et al., 2020).”

5. **Reviewer Comment:** The last paragraph of the section 2.2 is confusing. On line 104, number (1), you distinguish between meteorological factors and atmospheric circulation patterns? What exactly do you refer to when you mention atmospheric circulation patterns, this has not been introduced before. Would this be the SLP, GPH200 and the wind components? If so, SLP is not an atmospheric circulation variable, and needs to be corrected. If not, then it would need to be better explained or rewritten to improve clarity.

**Response:** We agree that our terminology was not sufficiently clear in the original manuscript. In the revised manuscript, we have clarified this terminology. Specifically, we now explicitly define:

Meteorological factors as local surface climate variables that directly affect crop growth (e.g., temperature, precipitation, soil moisture, radiation, and humidity).

Atmospheric circulation patterns as large-scale circulation fields that characterize regional and hemispheric circulation variability (e.g., sea-level pressure, geopotential height, and winds).

Although we acknowledge that sea-level pressure (SLP) is sometimes grouped as a surface variable, in this study we treat SLP as part of the large-scale circulation fields because it reflects broad-scale pressure systems and circulation anomalies. This distinction is now clearly stated in the Methods section to avoid confusion.

**Manuscript changes:** In Section 2.2, we added a sentence: “For clarity, in this study, we define meteorological factors as local surface climate variables that directly affect crop growth (e.g., Tmx, Pre, SMroot, DSRF, and VPD). In contrast, we define atmospheric circulation patterns as large-scale circulation fields that characterize regional and hemispheric variability, including SLP, GPH200, and 925 hPa winds.”

## Results & Discussion:

1. **Reviewer Comment:** The results section combines both actual results and contextualisation aspects that should go into the discussion. And as a consequence, the discussion section is rather small and underdeveloped, looking more like a conclusion than a discussion. Based on that, I would suggest to have the discussion considerably expanded, with the main findings properly contextualised there. For example, the authors find DTR to be important for soybean yield using the ridge regression, which is a statistical approach. I'd like to see potential physical explanations for that (after all, DTR is the difference between two other variables, which could mean many things). Also, have other

studies found similar or diverging relations between DTR and soybean yields in the area of study? These aspects should be properly discussed (you could move some of the small contextualisation points from the results to the discussion and expand them there into a coherent text).

**Response:** We have extensively revised the Discussion. We expanded it to include:

- (1) A detailed interpretation of the meteorological predictors Tmax and SMroot, explaining their complementary roles in capturing atmospheric heat stress, soil water availability, and nighttime temperature effects.
- (2) A discussion of the importance of DTR for soybean yield assessments.

These additions strengthen the physical and agronomic interpretation of our results.

2. **Reviewer Comment:** I also missed the theoretical implications of the findings: what does it mean to have IOB index influencing soybean variability (beyond the practical point of using it to monitor it in advance)? For instance, can it have any interactions with other major climate phenomena, such as climate change? While this is not the focus of the paper, it could still be briefly discussed. Ex: *What are the future projections for the IOB index? What are the future projections for soybean production in the US? Could we see a compounding interaction between both of them?* These could be part of a “future work recommendation” section of what could be done next from these findings.

**Response:** We have expanded the Discussion in response to your comment. The revised text discusses the following points:

- (1) Indian Ocean warming. Although our study focuses on interannual IOB variability, we note that climate change is projected to cause continued and spatially heterogeneous warming of the tropical Indian Ocean, which may alter IOB variability and strengthen its teleconnections (Cai et al., 2014; Gopika et al., 2025; Rao et al., 2012; Sharma et al., 2023).
- (2) Soybean yield projections. We added discussion of projected U.S. soybean yield declines, with losses of 30-40% by the end of the century even under low-emission scenarios (Schlenker and Roberts, 2009) and further reductions under a high-emissions scenario (Hultgren et al., 2025).
- (3) Compounding interactions. We highlight the possibility that enhanced IOB variability may interact with a more drought-prone U.S. climate, creating compound risks for soybean production.
- (4) Future research. We suggest using coupled climate-crop models to assess these interactions and emphasize adaptation strategies, as well as integrating IOB monitoring into early-warning systems.

3. **Reviewer Comment:** Finally, I would suggest for the code to be made openly available.

**Response:** We will make the code openly available and provide the access link in the Data Availability section of the revised manuscript.

Minor comments:

Line 26: According to FAOSTAT, Brazil has been the main soybean producer for the past years.

**We agree that, according to FAOSTAT, Brazil has been the leading soybean producer in recent years, particularly after 2018. However, our study focuses on the period 1978–2019, during which the United States consistently remained the largest soybean producer until Brazil’s recent overtaking. To avoid confusion, we have added a figure (Supplementary Figure S1) comparing U.S. and Brazilian soybean production trends, which highlights that the U.S. was the dominant producer throughout most of our study period, with Brazil surpassing only in the very last years.**

Line 56: there are different verbal tenses on the same paragraph (past and present), I recommend sticking to one for consistency.

**We have revised this paragraph.**

Line 58: a matter of personal taste, but I find adjectives like “valuable” unnecessary in a scientific article.

**We have removed this word.**

Line 59 "food security"

**We have revised this word.**

Line 84: This is a matter of personal preference, but it’s more common to define precipitation as “Pr” or “Precip” than “Pre”

**We have revised the notation and now use “Precip” to represent precipitation throughout the manuscript for consistency.**

Line 128: can you explain explicitly in the text the logical jump (coefficient of determination ( $R^2$ )) between the -0.41 corr and the 16% variability?

**In the original text, we reported that the correlation coefficient of -0.41 corresponds to 16% of the variability. This comes from the relationship  $R^2 = r^2$  in simple linear regression, where  $r = -0.41$  gives  $R^2 = 0.1681 \approx 0.16$ . To be more precise, we have revised the manuscript to report the exact value of 16.8% instead of the rounded 16%.**

Figure 2: Y axis “Values” is not informative enough.

**We have updated the y-axis label in Figure 2 to “Yield Change (% per  $\sigma$ )” to provide a clear and informative description of the plotted values.**

Line 213: Can you improve the clarity of the correlation sentence?

**We have revised this sentence.**

## Reference

- Cai, W., Santoso, A., Wang, G., Weller, E., Wu, L., Ashok, K., Masumoto, Y., Yamagata, T., 2014. Increased frequency of extreme Indian Ocean Dipole events due to greenhouse warming. *Nature* 510, 254–258. <https://doi.org/10.1038/nature13327>
- Ergo, V.V., Lascano, R., Vega, C.R.C., Parola, R., Carrera, C.S., 2018. Heat and water stressed field-grown soybean: A multivariate study on the relationship between physiological-biochemical traits and yield. *Environmental and Experimental Botany* 148, 1–11. <https://doi.org/10.1016/j.envexpbot.2017.12.023>
- Fan, J., McConkey, B., Wang, H., Janzen, H., 2016. Root distribution by depth for temperate agricultural crops. *Field Crops Research* 189, 68–74. <https://doi.org/10.1016/j.fcr.2016.02.013>
- Gaupp, F., Hall, J., Hochrainer-Stigler, S., Dadson, S., 2020. Changing risks of simultaneous global breadbasket failure. *Nat. Clim. Chang.* 10, 54–57. <https://doi.org/10.1038/s41558-019-0600-z>
- Giraud, L., Langou, J., Rozloznik, M., 2005. The loss of orthogonality in the Gram-Schmidt orthogonalization process. *Computers & Mathematics with Applications* 50, 1069–1075. <https://doi.org/10.1016/j.camwa.2005.08.009>
- Gobin, A., Van de Vyver, H., 2021. Spatio-temporal variability of dry and wet spells and their influence on crop yields. *Agric. For. Meteorol.* 308, 108565. <https://doi.org/10.1016/j.agrformet.2021.108565>

- Gopika, S., Sadhvi, K., Vialard, J., Danielli, V., Neetu, S., Lengaigne, M., 2025. Drivers of Future Indian Ocean Warming and Its Spatial Pattern in CMIP Models. *Earth's Future* 13, e2025EF006112. <https://doi.org/10.1029/2025EF006112>
- Hamed, R., Van Loon, A.F., Aerts, J., Coumou, D., 2021. Impacts of compound hot–dry extremes on US soybean yields. *Earth Syst. Dynam.* 12, 1371–1391. <https://doi.org/10.5194/esd-12-1371-2021>
- Harris, I., Osborn, T.J., Jones, P., Lister, D., 2020. Version 4 of the CRU TS monthly high-resolution gridded multivariate climate dataset. *Sci Data* 7, 109. <https://doi.org/10.1038/s41597-020-0453-3>
- Hersbach, H., Bell, B., Berrisford, P., Hirahara, S., Horányi, A., Muñoz-Sabater, J., Nicolas, J., Peubey, C., Radu, R., Schepers, D., Simmons, A., Soci, C., Abdalla, S., Abellan, X., Balsamo, G., Bechtold, P., Biavati, G., Bidlot, J., Bonavita, M., De Chiara, G., Dahlgren, P., Dee, D., Diamantakis, M., Dragani, R., Flemming, J., Forbes, R., Fuentes, M., Geer, A., Haimberger, L., Healy, S., Hogan, R.J., Hólm, E., Janisková, M., Keeley, S., Laloyaux, P., Lopez, P., Lupu, C., Radnoti, G., De Rosnay, P., Rozum, I., Vamborg, F., Villaume, S., Thépaut, J., 2020. The ERA5 global reanalysis. *Quart J Royal Meteor Soc* 146, 1999–2049. <https://doi.org/10.1002/qj.3803>
- Hou, Y., Xie, S.-P., Johnson, N.C., Wang, C., Yoo, C., Deng, K., Sun, W., Li, X., 2024. Unveiling the Indian Ocean forcing on winter eastern warming – western cooling pattern over North America. *Nat Commun* 15, 9654. <https://doi.org/10.1038/s41467-024-53921-y>
- Hultgren, A., Carleton, T., Delgado, M., Gergel, D.R., Greenstone, M., Houser, T., Hsiang, S., Jina, A., Kopp, R.E., Malevich, S.B., McCusker, K.E., Mayer, T., Nath, I., Rising, J., Rode, A., Yuan, J., 2025. Impacts of climate change on global agriculture accounting for adaptation. *Nature* 642, 644–652. <https://doi.org/10.1038/s41586-025-09085-w>
- Joshi, V.R., Kazula, M.J., Coulter, J.A., Naeve, S.L., Garcia Y Garcia, A., 2021. In-season weather data provide reliable yield estimates of maize and soybean in the US central Corn Belt. *Int J Biometeorol* 65, 489–502. <https://doi.org/10.1007/s00484-020-02039-z>
- Leng, G., Hall, J., 2019. Crop yield sensitivity of global major agricultural countries to droughts and the projected changes in the future. *Science of The Total Environment* 654, 811–821. <https://doi.org/10.1016/j.scitotenv.2018.10.434>
- Otkin, J.A., Anderson, M.C., Hain, C., Svoboda, M., Johnson, D., Mueller, R., Tadesse, T., Wardlow, B., Brown, J., 2016. Assessing the evolution of soil moisture and vegetation conditions during the 2012 United States flash drought. *Agricultural and Forest Meteorology* 218–219, 230–242. <https://doi.org/10.1016/j.agrformet.2015.12.065>
- Rao, S.A., Dhakate, A.R., Saha, S.K., Mahapatra, S., Chaudhari, H.S., Pokhrel, S., Sahu, S.K., 2012. Why is Indian Ocean warming consistently? *Climatic Change* 110, 709–719. <https://doi.org/10.1007/s10584-011-0121-x>
- Ray, D.K., Gerber, J.S., MacDonald, G.K., West, P.C., 2015. Climate variation explains a third of global crop yield variability. *Nat Commun* 6, 5989. <https://doi.org/10.1038/ncomms6989>
- Schauberger, B., Archontoulis, S., Arneth, A., Balkovic, J., Ciais, P., Deryng, D., Elliott, J., Folberth, C., Khabarov, N., Mueller, C., Pugh, T.A.M., Rolinski, S., Schaphoff, S., Schmid, E., Wang, X., Schlenker, W., Frieler, K., 2017. Consistent negative response of US crops to high temperatures in observations and crop models. *Nat. Commun.* 8. <https://doi.org/10.1038/ncomms13931>



- Schlenker, W., Roberts, M.J., 2009. Nonlinear temperature effects indicate severe damages to U.S. crop yields under climate change. *Proc. Natl. Acad. Sci. U.S.A.* 106, 15594–15598. <https://doi.org/10.1073/pnas.0906865106>
- Sharma, S., Ha, K.-J., Yamaguchi, R., Rodgers, K.B., Timmermann, A., Chung, E.-S., 2023. Future Indian Ocean warming patterns. *Nat Commun* 14, 1789. <https://doi.org/10.1038/s41467-023-37435-7>
- Zhang, Y., Yang, X., Tian, F., 2024. Study on Soil Moisture Status of Soybean and Corn across the Whole Growth Period Based on UAV Multimodal Remote Sensing. *Remote Sensing* 16, 3166. <https://doi.org/10.3390/rs16173166>
